# Supplementary material
Source: PubMed Central journal article supplement (PMC2570739)
Supplement: tpc.108.059345_1.pdf [file tpc.108.059345_1.pdf]

Supplemental Data. Yamada et al. (2008). NAI2 is an endoplasmic reticulum (ER) body component that enables ER body formation in *Arabidopsis thaliana*.

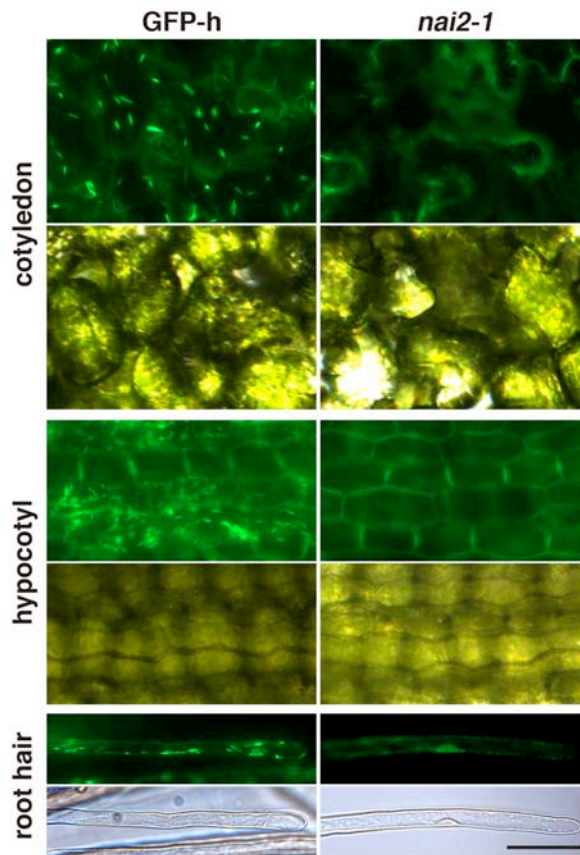

**Supplemental Figure 1. GFP fluorescence and bright field images of the GFP-h plant and *nai2-1* mutant.**

Cotyledons, hypocotyls and root hair cells of 7-day-old seedlings were inspected under a microscope. Upper panels are the GFP fluorescence images and lower panels are the bright field images. All panels are shown at the same resolution.

Bar = 50  $\mu\text{m}$ .

**A**

|                                                     |     |                |
|-----------------------------------------------------|-----|----------------|
| MEIYTMKTNFLVLALSICILLSSFHEVSC                       | 29  | Signal Peptide |
| QDDGSGLSNLDLIERDYQDSVNALQGKDEDEDQSAKIQSENQNNTTVTDKN | 79  |                |
| TISLSLSDSEEV                                        | 91  |                |
| GSVSDSESVGRSSLLDQIKLEFEAHHNSINQAGSDGVKAESK          | 132 | EFE repeat     |
| DDDEELSAHRQKMLEEIEHEFEAASDSLKQLKTDDVNE              | 170 |                |
| GNDEEHSAKRQSLLEEIEREFEEAATKELEQLKVNDFDFTGD          | 209 |                |
| KDDEEHSAKRKSMLLEIEREFEEAAMEGIEALKVSDSTGS            | 248 |                |
| GDDEEQSAKRSLMLEEIEREFEGLEQLRASDSTAD                 | 283 |                |
| NNEEEHAAKGQSLLEEIEREFEEAATESLQQLQVDDSTE             | 321 |                |
| DKEHFTAARKRQSLLEEIEREFEEAATKDLKQLNDFTEG             | 358 |                |
| SADDEQSAKRNMLEDIEREFEEAATIGLEQLKANDFSEG             | 397 |                |
| NNNEEQSAKRKSMLEEIEREFEEAATIGGLKQIKVDDS              | 433 |                |
| RNLEEEESAKRKIILEEMEREFEEAHSGINAKADKEE               | 469 |                |
| SAKQSGSAIPEVLGLGQSGGSCSKQDEDSSIVIPTKYSIEDILSEESA    | 519 | NAI2 domain    |
| VQGTETSSLTASLTQLVENHRKEKESLLGHRVLTSPSIASSTSESSATSE  | 569 |                |
| TVETLRAKLNELRGLTARELVTRKDFGQILITAASFEELSSAPISYISRL  | 619 |                |
| AKYRNVIKEGLEASERVHIAQVRKMLKEVATEKQTAVDTHFATAKLAQ    | 669 |                |
| EGDALFVKIFAIKKLLAKLEAEKESVDGKFKETVKELSHLLADASEAYEE  | 719 |                |
| YHGAVRKAKDEQAAEEFAKEATQSAEIIWVKFLSSL                | 755 |                |

**B**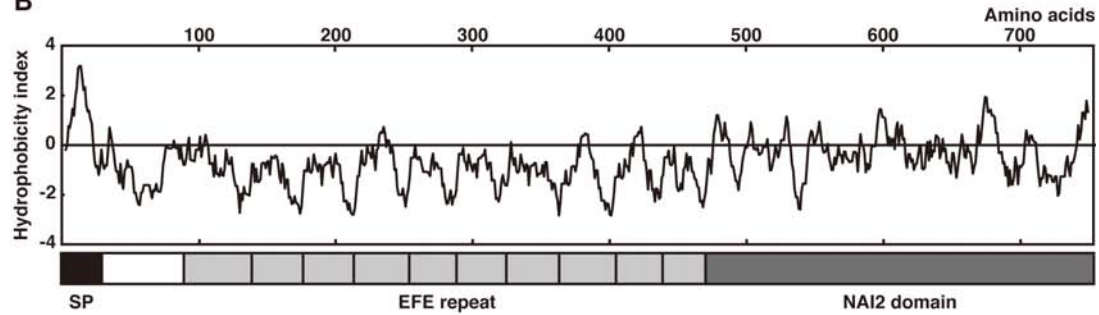**C**

|                                                    |     |                |
|----------------------------------------------------|-----|----------------|
| MGRKYVVLGLAVCLFLSSFNEVSC                           | 24  | Signal Peptide |
| QAEGGISSNSEFQGSFLEEVEVTKIESESQSSSSEQNTKLSMSEENQ    | 74  |                |
| EDSFDVDKFIIESEAVSSREELGQSSSMDEVNRDLEAILDSLNRDGSDDI | 124 |                |
| SKVGESMDAAGIAAATNIVVEDGTSKRKSKVEETQEVVKFESESSASS   | 174 |                |
| E                                                  | 175 |                |
| SRRQSSSSYNFNGKTGGSEMLGSLGISQSGSWRCYNQDKNGVSEEDTS   | 225 | NAI2 domain    |
| IVIPKYDIDSIIKEESTSQGSSSKTSSLIASLTKIVEKHRKEKWSSGVSV | 275 |                |
| SVTKGASSTQTSETVEKLVTLKRYRGLSARELVARSDFEEILATAARYE  | 325 |                |
| ELSSASVSHISRLSMYRSVIKEGKASQRVQLAYARTRLLKEMAVEKQKN  | 375 |                |
| VDAELALVKALBERGDMLYVKIFAIKKLLSKLEAEKYEVDMTPEKTVANL | 425 |                |
| SRVIEEASQAYEYHVVRKWKKEEQASEEFSREAIERVEMVWVEFLSTL   | 474 |                |

**D**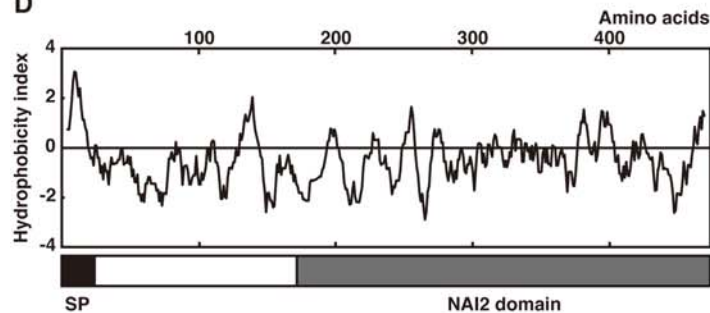

**Supplemental Figure 2. Structures of the Two NAI2 Homologues in *A. thaliana*.**

**(A)** The deduced amino acid sequence of TSA1. The numbers show the amino acid residue positions. TSA1 contains a signal peptide, EFE repeats and a NAI2 domain. The bold characters indicate the conserved amino acids within the EFE repeats.

**(B)** Hydrophobicity index of TSA1. The structure of TSA1 is shown below.

**(C)** The deduced amino acid sequence of the At3g15960 protein. The numbers show the amino acid residue positions. The At3g15960 protein contains a signal peptide and a NAI2 domain but lacks EFE repeats.

**(D)** Hydrophobicity index of the At3g15960 protein. The structure of the At3g15960 protein is shown below.

**A**

```

GGAAGCTTTGAAACACTGTGCTTGTAAATGGAATATCCGCCATAAGAATGAAATTTTCTC 60
M E I S A I R M N F L 11
CGCGTGGGTTTGTCTCTGTGCTTGTCTTTTCGAGTTCCATGGCGTTTCTTGTCCAGGAT 120
A L G L S L C L V L S S F H G V S C Q D 31
GATGGTGGCTGCTAGTAGGTTGAGTCACTGGATCTAATCGAACGTGAGTACCAAGATAGT 180
D G A A S R L S H L D L I E R E Y Q D S 51
GTCAATGCTCTTCAAGCAAGGAAGATCAGTCTGCAAGTATTGAGAGTGAAGAACGAAAG 240
V N A L Q G K E D Q S A S I Q S E N Q K 71
AACACTACAGCGACTGATAAGAACACTATTTCTGTCTATCAGATGAATCTGAGGTT 300
N T T A T D K N T I S L S L S D E S E V 91
GGAGGAGTGAAGTGAAGTGTAAAAATTCGAGTCTGTTGGATGACATGAACCTTGA 360
G G V S D E S V K N S S L L D D I E L E 111
ATTGAAGCTCATCTCAATGGTCTTAACCAAGCTGGATCCGCTGATGTTAATGCTGAATCC 420
I E A H L N G L N Q A G S A D V N A E S 131
AAATATGATGAAGTATTATCTGCACAGAGACAGAAGTGTGGAAGACATCGAACCGGAT 480
K Y D E V L S A Q R Q K M L E D I E R D 151
TTTGAAGCTGCTTCAACGCAAGTTTGAACAAATAAAGACTGATGAATTAAGTGAAGGA 540
F E A A S S A S L E Q I K T D E L S E G 171
ATTAATGAGCAACAATCTGCAAGAAACATAGTTTGTGGAAGAGATCGAACCGCAATTT 600
I N E Q Q S A K K H S L L E E I E R E F 191
GAACTGCTACAAAAGATCTTGAACAACTAAAGGTTAATGACTTCACTGGGAACAAGCTT 660
E T A T K D L E Q L K V N D F T G N K L 211
GACGAAGAACATCTGCAAGAGAAAAGCATGCTTGAAGTATTGAACCGCAGTTTGA 720
D E E Q S A K R K S M L E A I E R E F E 231
GCTGCTGTTGAAGGCTTGAAGAACTAAAGGTTTCTGATTTACCAGGAGCAAGGATGAT 780
A A V E G L E E L K V S D S T G S K D D 251
GAAGAACAATCTGCAAGAGACTAAGCGTCTGGAAGAGATTGAACGGGAATTCGAAGCT 840
E E Q S A K R L S V L E E I E R E F E A 271
GCTACAGAGAGCTTAAAGCAACTTCAAGTTGATGTTTCCAGTGAAGACACAGAACAACT 900
A T E S L K Q L Q V D G S S E D T E Q T 291
GGAAAGGCAAGTATGCTTGAAGAGATTGAAGCTGAATTTGAAGCTGCTACAGCTGAT 960
G K R Q S M L D E I E R E F E A A T R D 311
CTTAAGCAGCTAAATGATTTCACTGAAGGAGCTGATGATGAACAATCTGCAAGAGAAAC 1020
L K Q L N D F T E G A D D E Q S A K R N 331
AGTGTAGTAGAAGAGATGGAACGTGAGTTTGAAGCTGCTACAAAAAATTTAATTTT 1080
S V V E E M E R E F E A A T K K L N Y L 351
GCTGAAGGCTGACAAATGAAGAACAATCTGCAAGAGGAAGACTATGCTTGAAGAGATG 1140
A E G S D N E E Q S A K R K T M L E E M 371
GAAGCTGAATTTGAAGCTGCCATTGAGGCTTAAACAGATCAAGATGACGAATCTAAG 1200
E R E F E A A I G G L K Q I K D D E S K 391
TACACTGAAGAACAGCATCTAAGAGAAAAGTAAATGTTGAAGAGATCGAACCGCAATTC 1260
Y T E E Q A S K R K I M L E E I E R E F 411
GAAGAAGCTCGAAGTGGCTTAGCACAAATGCTAATAAAGAAGACTCTGCAAGAAACAT 1320
E E A R S G F S T N A N K E G S A K K H 431
AGTATTACATTAGAGTCTCTTGGACTAGGACAGTCAAGTCTGTGGCTGTTTAAATCAA 1380
S I T L E S L G L G Q S G V C G C F N Q 451
GACAAAGCTGGTTTAAAGCAAGAGAGATGCTTCAATCGCTATATCAACAAAATATAGC 1440
D K A G L K Q D E D A S I A I S T K Y S 471
ATAGAAGAGATCCTCACTGAAGAATCTTCACTCCAGGGCACAGATACTTCTTAGTCTC 1500
I E E I L T E E S S L Q G T D T S S S L 491
ACTAAGCTTTGACTCAACTAGTTGAGAATCACAGAAAAGAAAGAAATCTCATAATGTG 1560
T K S L T Q L V E N H R K E K E S H N V 511
CACACTTCCACAAAGTGAATCAGCAGCCACATCAGAGACTGTAGAGAGCCTTAGAGCT 1620
H T S S T S E S A A T S E T V E S L R A 531
AAACTGAGAGAGCTTCTGTGGCTTAAACCGCTCGTCAAGTCTGACACGCAAGATTTGAG 1680
K L R E L R G L T A R Q L V T R Q D F E 551
AGCATTTATCCCTTATGGCTGCAACTTTCGAAGAGCTAAGCTCAGCTCCCATCAGTTACATT 1740
S I I L M A A T F E E L S S A P I S Y I 571
TCTAGTTAGCTAAATACGGAACGCTCATAAAGAAGGACTTGAAGCTTCTGAGAGATC 1800
S R L A K L A G N V I K E G L E A S E R V 591
CACATGGCAAGCAAGAGCCACAATGCTCAAAGAGACTTCCAGGAGAGAGCAGATCTTC 1860
H M A K A R A T M L K E T S R E K Q I F 611
GTGGAGCTTAAGTTCGAAGAGGCTAAGAAGCTTGTCTCAAAGAGGAGACTTCTGTAGCTT 1920
V D A N F E E A K K L A Q R G D S L Y V 631
AGAATTTGCGATCAAGAACTGTTGAAGAAGCTTGAAGTGAAGAGAGATCTGTTGATG 1980
R I F A I K K L L K K L E T E R E S V D 651
GTGATGTTAAGGAGATTTGAAAAGGCTTTCTCATCTTCTTGTGATGCTTCTGAGGCC 2040
V M F K E I V K G L S H L L V D A S E A 671
TATGAAGAGTATCATGGAGCTGTAAGGAAGCTAAGACAGAGCAAGCAGCTGAGGATTT 2100
Y E E Y H G A V R K A K D E Q A A E E F 691
GCGAGAGAGCAAGCAGAGTGCAGAGATAATATGGGTTAAGTTTCTTAGTCTCTTATG 2160
A R E A T Q S A E I I W V K F L S S L * 710
AGAACAGTTGAGATCTTTGTTGTCTTTAGAGCAAGTCTAGAGCTCTGTTGGTTATG 2220
TTTTCTACCTTGTGTTATGTTCTGTTTCAAGCTTTGTGTTGGTTATATCAGGAGAGA 2280
GAGAGATTTGGAGATAGAGAGGGGAAAAAATAATGTTTATTTAGATTTCTAATAAAA 2340
ATAAGCTCCCAATAATCAAAAAAAGGGTTGC 2375

```

**B**

```

MEISAIRMNFLALGLSLCLVLS SFHGVSC 29 Signal Peptide
QDDGAASRLSHLDLIEREYQDSVNALQ GKEDQSASIQSENQKN TTATDKN 79
TISLSLSDESEV 91

GGVSDSESVKNSSLLDDIELEIEAHLNGLN QAGSADVNAES 131 EFE repeat
KYDEVLSAQRQKMLEIERDFEAASSASLEQIKTDELSE 170
GINEQQSAKHS LLEEIEREFETATKDLEQLKVNDF TGN 209
KLDEEQSAKRKSMLEA IEREFEEAVEGLEELKVS DSTGS 248
KDDEEQSAKR LSVLEEIEREFEEAATESLKQLQVDGS 284
SEDTEQTKRQ SMLDEIEREFEEAATRD LKQLNDFTE 320
GADDEQSAKRNSVVEEMEREFEEAATKKNLYLAEG 354
SDNEEQSAKR KTMLEEMEREFEEA IGG LKQIKDDES 390
KYTEEQASKR KIMLEEIEREFEEARS GFSTNANKEG 426

SAKHSITLES LGLGQSGVCGCFNQDKAGLQDE DASAISTKY SIEEIL 476 NAI2 domain
TEESSLQGTDTSSSLTKSLTQLVENHRKEKESHNVHTSSTSESAA TSETV 526
ESLRAKLREL RGLTARQLVTRQDFESIILMAATFEELS SAPISYISRLAK 576
YGNVIKEGLEASERVHMAKARATMLKETSREKQIFVDANFEEAKKLAQRG 626
DSLYVRIFA I K L L K L E T E R E S V D V M F K E I V K L S H L L V D A S E Y E E Y H 676
GAVRKAKDEQAEEFFAREATQSAEIIWVKFLSS L 700

```

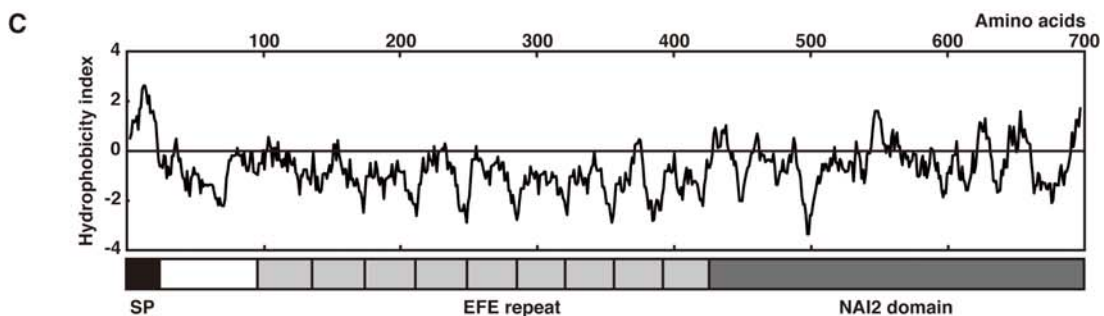

**Supplemental Figure 3. Structure of the NAI2 Homologue in *B. napus*.**

**(A)** Nucleotide and deduced amino acid sequences of TC74287. The numbers show the nucleotides or amino acid residue positions.

**(B)** The primary structure of the TC74287 protein. The numbers show the positions of amino acid residues. TC74287 consists of a signal peptide, nine EFE repeats, and a NAI2 domain. The bold characters show the conserved amino acids within the EFE repeats.

**(C)** Hydrophobicity index of the TC74287 protein. The structure of the TC74287 protein is shown below.

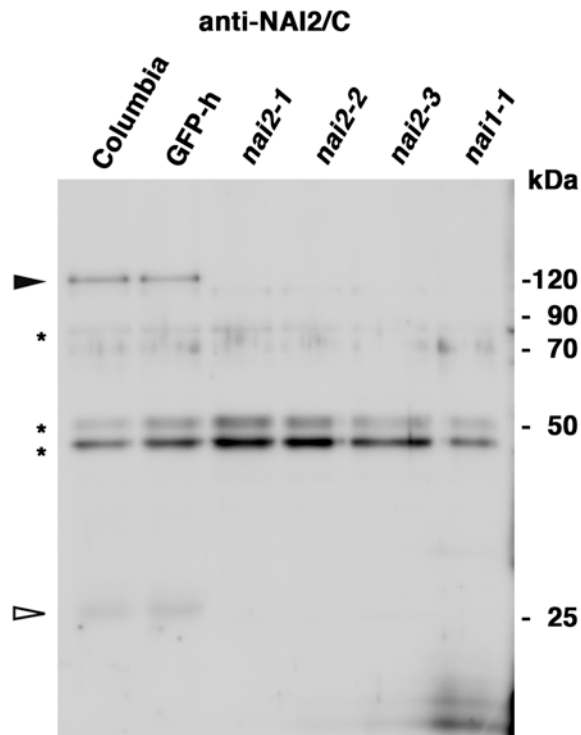

**Supplemental Figure 4. Immunoblot analysis using antibody against NAI2/C.**

Immunoblot analysis of 7-day-old seedlings from the indicated strains using antibody against NAI2/C (amino acid residues 636-772). Arrowheads indicate the bands corresponding to the NAI2 polypeptide; closed, major bands; open, minor bands. Asterisks indicate the non-specific bands.

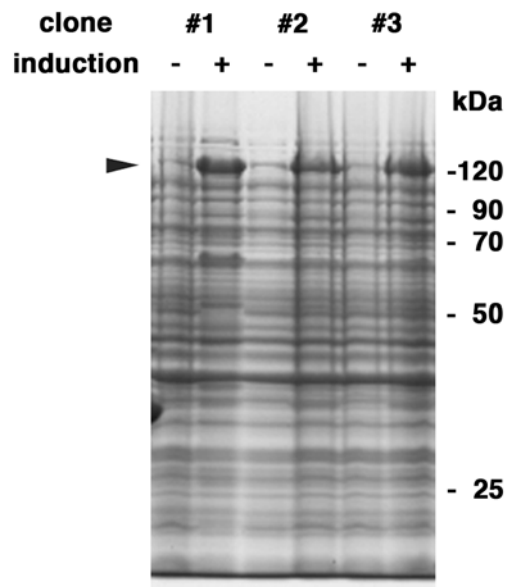

**Supplemental Figure 5. SDS-PAGE of *E. coli* expressing NAI2.**

The expression of recombinant NAI2 (His-tagged NAI2/ $\Delta$ SP) was induced in *E. coli* (BL21-AI) by the addition of 0.2% L-arabinose to the growth medium. The total proteins were separated by SDS-PAGE and then subsequently stained with Coomassie brilliant blue. The arrowhead indicates the bands corresponding to His-tagged NAI2/ $\Delta$ SP. The results of three independent clones are shown.

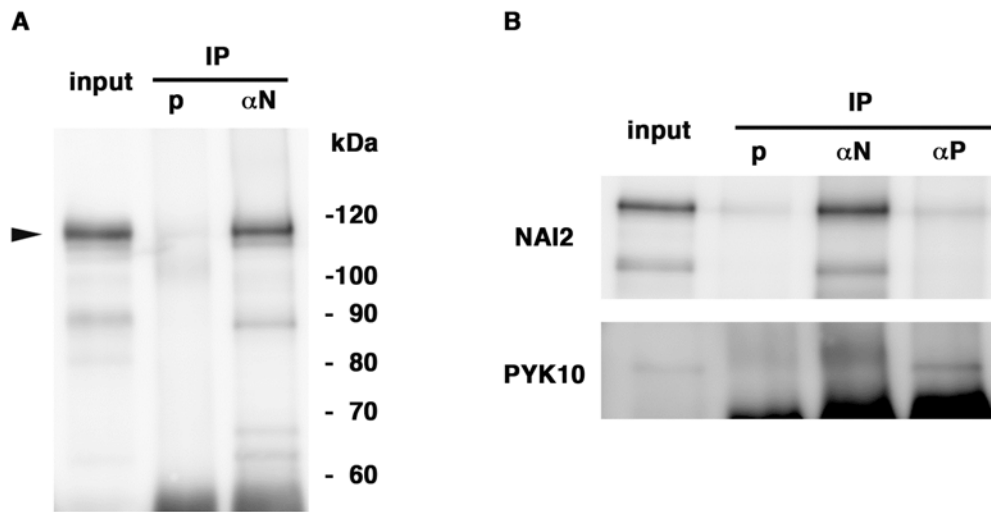

### Supplemental Figure 6. Immunoprecipitation of NAI2 and PYK10

**(A)** The immunoprecipitation (IP) experiment was performed with preimmune serum (p) or anti-NAI2/C antibody ( $\alpha$ N), and precipitated proteins were subjected to immunoblot analysis with anti-NAI2/ $\Delta$ SP antibody. An arrowhead indicates NAI2 protein. Input lane shows one-twentieth of the amount used for immunoprecipitation.

**(B)** The immunoprecipitation (IP) experiment was performed with preimmune serum (p), anti-NAI2/ $\Delta$ SP antibody ( $\alpha$ N) or anti-PYK10 antibody ( $\alpha$ P), and precipitated proteins were subjected to immunoblot analysis with anti-NAI2/ $\Delta$ SP (upper) or anti-PYK10 antibody (lower). Input lane shows one-twentieth of the amount used for immunoprecipitation.



**Supplemental Table 1. Genes that Are Coexpressed with the *NAI1* Gene According to ATTED-II.**

| Rank* | Correlation | Locus     | Anotation                                                                               |
|-------|-------------|-----------|-----------------------------------------------------------------------------------------|
| 0     | 1.00        | At2g22770 | <i>NAI1</i>                                                                             |
| 1     | 0.73        | At5g24290 | integral membrane family protein                                                        |
| 2     | 0.68        | At3g15950 | ( <i>NAI2</i> )                                                                         |
| 3     | 0.67        | At1g14120 | 2-oxoglutarate-dependent dioxygenase, putative                                          |
| 5     | 0.65        | At3g20370 | meprin and TRAF homology domain-containing protein / MATH domain-containing protein     |
| 6     | 0.65        | At3g16460 | jacalin lectin family protein                                                           |
| 7     | 0.63        | At5g60890 | ATR1 (ALTERED TRYPTOPHAN REGULATION)                                                    |
| 8     | 0.63        | At5g26260 | meprin and TRAF homology domain-containing protein / MATH domain-containing protein     |
| 9     | 0.62        | At3g16450 | jacalin lectin family protein                                                           |
| 10    | 0.61        | At3g16690 | nodulin MtN3 family protein                                                             |
| 11    | 0.60        | At5g26280 | meprin and TRAF homology domain-containing protein / MATH domain-containing protein     |
| 12    | 0.60        | At5g23830 | MD-2-related lipid recognition domain-containing protein / ML domain-containing protein |
| 13    | 0.60        | At1g22550 | proton-dependent oligopeptide transport (POT) family protein                            |
| 14    | 0.60        | At4g37410 | CYP81F4 (cytochrome P450, family 81, subfamily F, polypeptide 4)                        |
| 15    | 0.59        | At3g09260 | PYK10                                                                                   |
| 16    | 0.57        | At5g48000 | CYP708A2 (cytochrome P450, family 708, subfamily A, polypeptide 2)                      |
| 17    | 0.57        | At5g23820 | MD-2-related lipid recognition domain-containing protein / ML domain-containing protein |
| 18    | 0.57        | At1g64200 | VHA-E3 (VACUOLAR H <sup>+</sup> -ATPASE SUBUNIT E ISOFORM 3)                            |
| 19    | 0.56        | At2g39310 | jacalin lectin family protein                                                           |
| 20    | 0.56        | At2g38760 | ANNAT3 (ANNEXIN 3, ANNEXIN ARABIDOPSIS 3)                                               |
| 21    | 0.55        | At1g16370 | transporter-related                                                                     |
| 22    | 0.55        | At2g22330 | CYP79B3 (cytochrome P450, family 79, subfamily B, polypeptide 3)                        |
| 23    | 0.55        | At3g58710 | WRKY69 (WRKY DNA-binding protein 69)                                                    |
| 24    | 0.55        | At5g38030 | MATE efflux family protein                                                              |
| 25    | 0.54        | At1g78660 | ATGGH1                                                                                  |
| 26    | 0.54        | At5g20550 | oxidoreductase, 2OG-Fe(II) oxygenase family protein                                     |
| 27    | 0.54        | At5g47990 | CYP705A5 (cytochrome P450, family 705, subfamily A, polypeptide 5)                      |
| 28    | 0.54        | At4g29270 | acid phosphatase class B family protein                                                 |
| 29    | 0.54        | At4g29690 | type I phosphodiesterase/nucleotide pyrophosphatase family protein                      |
| 30    | 0.54        | At5g48010 | pentacyclic triterpene synthase, putative                                               |
| 31    | 0.53        | At4g21600 | bifunctional nuclease, putative                                                         |
| 32    | 0.53        | At5g52120 | ATPP2-A14 (Phloem protein 2-A14)                                                        |
| 33    | 0.53        | At1g72140 | proton-dependent oligopeptide transport (POT) family protein                            |
| 34    | 0.53        | At5g56760 | AtSerat1;1 (SERINE ACETYLTRANSFERASE 52)                                                |
| 35    | 0.53        | At3g46700 | UDP-glycosyltransferase/ transferase, transferring glycosyl groups                      |
| 36    | 0.53        | At1g22440 | alcohol dehydrogenase, putative                                                         |
| 37    | 0.52        | At5g63450 | CYP94B1 (cytochrome P450, family 94, subfamily B, polypeptide 1)                        |
| 38    | 0.52        | At5g23840 | MD-2-related lipid recognition domain-containing protein / ML domain-containing protein |
| 39    | 0.52        | At3g59340 |                                                                                         |
| 40    | 0.52        | At4g13660 | pinoresinol-lariciresinol reductase, putative                                           |

\*, top 40 coexpressed genes.

**Supplemental Table 2. Genes that Are Coexpressed with the *NAI2* Gene According to ATTED-II.**

| Rank* | Correlation | Locus     | Anotation                                                                               |
|-------|-------------|-----------|-----------------------------------------------------------------------------------------|
| 0     | 1.00        | At3g15950 | <i>NAI2</i>                                                                             |
| 1     | 0.91        | At3g16460 | jacalin lectin family protein                                                           |
| 2     | 0.89        | At3g09260 | <i>PYK10</i>                                                                            |
| 3     | 0.86        | At3g20370 | meprin and TRAF homology domain-containing protein / MATH domain-containing protein     |
| 4     | 0.84        | At3g16450 | jacalin lectin family protein                                                           |
| 5     | 0.79        | At2g39310 | jacalin lectin family protein                                                           |
| 6     | 0.79        | At5g23820 | MD-2-related lipid recognition domain-containing protein / ML domain-containing protein |
| 7     | 0.77        | At4g37410 | CYP81F4 (cytochrome P450, family 81, subfamily F, polypeptide 4)                        |
| 8     | 0.76        | At5g26260 | meprin and TRAF homology domain-containing protein / MATH domain-containing protein     |
| 9     | 0.75        | At5g26280 | meprin and TRAF homology domain-containing protein / MATH domain-containing protein     |
| 10    | 0.69        | At1g14120 | 2-oxoglutarate-dependent dioxygenase, putative                                          |
| 11    | 0.69        | At1g22550 | proton-dependent oligopeptide transport (POT) family protein                            |
| 12    | 0.69        | At4g27860 | integral membrane family protein                                                        |
| 13    | 0.68        | At4g29270 | acid phosphatase class B family protein                                                 |
| 14    | 0.68        | At2g22770 | <i>NAI1</i>                                                                             |
| 15    | 0.68        | At4g13660 | pinoresinol-lariciresinol reductase, putative                                           |
| 16    | 0.67        | At1g73330 | ATDR4 (Arabidopsis thaliana drought-repressed 4)                                        |
| 17    | 0.67        | At5g23830 | MD-2-related lipid recognition domain-containing protein / ML domain-containing protein |
| 18    | 0.65        | At1g70850 | Bet v I allergen family protein                                                         |
| 19    | 0.65        | At3g43600 | AAO2 (ALDEHYDE OXIDASE 2)                                                               |
| 20    | 0.64        | At1g15210 | ATPDR7/PDR7 (PLEIOTROPIC DRUG RESISTANCE 7)                                             |
| 21    | 0.64        | At3g21770 | peroxidase 30 (PER30) (P30) (PRXR9)                                                     |
| 22    | 0.64        | At4g21600 | bifunctional nuclease, putative                                                         |
| 23    | 0.64        | At1g31710 | copper amine oxidase, putative                                                          |
| 24    | 0.64        | At5g24290 | integral membrane family protein                                                        |
| 25    | 0.63        | At5g63600 | flavonol synthase, putative                                                             |
| 26    | 0.63        | At2g21045 |                                                                                         |
| 27    | 0.63        | At1g29280 | WRKY65 (WRKY DNA-binding protein 65)                                                    |
| 28    | 0.62        | At5g64100 | peroxidase, putative                                                                    |
| 29    | 0.62        | At1g22440 | alcohol dehydrogenase, putative                                                         |
| 30    | 0.62        | At4g11190 | disease resistance-responsive family protein / dirigent family protein                  |
| 31    | 0.62        | At5g60890 | ATR1 (ALTERED TRYPTOPHAN REGULATION)                                                    |
| 32    | 0.62        | At3g09270 | ATGSTU8 (Arabidopsis thaliana Glutathione S-transferase (class tau) 8)                  |
| 33    | 0.61        | At4g14465 | DNA-binding protein-related                                                             |
| 34    | 0.60        | At5g48000 | CYP708A2 (cytochrome P450, family 708, subfamily A, polypeptide 2)                      |
| 35    | 0.60        | At3g16690 | nodulin MtN3 family protein                                                             |
| 36    | 0.60        | At4g30170 | peroxidase, putative                                                                    |
| 37    | 0.60        | At3g44990 | XTR8 (xyloglucan:xyloglucosyl transferase 8)                                            |
| 38    | 0.60        | At4g17800 | DNA-binding protein-related                                                             |
| 39    | 0.60        | At5g59090 | subtilase family protein                                                                |
| 40    | 0.60        | At5g38030 | MATE efflux family protein                                                              |

\*, top 40 coexpressed genes.

**Supplemental Table 3. Proteins that Colocalize with NAI2 According to LOPIT Data.**

| Rank* | Distance** | PC1   | PC2  | Locus     | Annotation                                                                          |
|-------|------------|-------|------|-----------|-------------------------------------------------------------------------------------|
| 0     | 0.000      | -1.19 | 2.93 | At3g15950 | NAI2                                                                                |
| 1     | 0.105      | -1.14 | 3.02 | At1g56070 | LOS1, elongation factor 2, putative / EF-2, putative                                |
| 2     | 0.497      | -0.93 | 2.51 | At2g16060 | non-symbiotic hemoglobin 1 (HB1) (GLB1)                                             |
| 3     | 0.518      | -0.79 | 3.26 | At3g16460 | jacalin lectin family protein                                                       |
| 4     | 0.525      | -1.09 | 2.41 | At5g26260 | meprin and TRAF homology domain-containing protein / MATH domain-containing protein |
| 5     | 0.568      | -1.76 | 2.93 | At1g77120 | alcohol dehydrogenase (ADH)                                                         |
| 6     | 0.575      | -1.72 | 3.15 | At3g52930 | fructose-bisphosphate aldolase, putative                                            |
| 7     | 0.592      | -1.54 | 2.45 | At5g24290 | integral membrane family protein                                                    |
| 8     | 0.649      | -1.82 | 2.79 | At5g02450 | 60S ribosomal protein L36 (RPL36C)                                                  |
| 9     | 0.681      | -0.58 | 2.62 | At5g26280 | meprin and TRAF homology domain-containing protein / MATH domain-containing protein |
| 10    | 0.692      | -1.20 | 2.24 | At4g04910 | AAA-type ATPase family protein                                                      |
| 11    | 0.693      | -1.10 | 2.24 | At1g69840 | band 7 family protein                                                               |
| 12    | 0.729      | -1.40 | 2.23 | At1g17290 | alanine aminotransferase, putative                                                  |
| 13    | 0.846      | -0.36 | 3.11 | At2g30860 | glutathione S-transferase, putative                                                 |
| 14    | 0.850      | -1.63 | 3.65 | At4g23850 | long-chain-fatty-acid--CoA ligase / long-chain acyl-CoA synthetase                  |
| 15    | 0.854      | -2.04 | 2.89 | At5g09810 | actin 7 (ACT7) / actin 2                                                            |
| 16    | 0.881      | -1.78 | 2.28 | At1g24510 | T-complex protein 1 epsilon subunit, putative                                       |
| 17    | 0.928      | -2.12 | 2.96 | At4g17120 | expressed protein                                                                   |
| 18    | 0.946      | -2.07 | 2.57 | At5g19550 | aspartate aminotransferase, cytoplasmic isozyme 1 / transaminase A (ASP2)           |
| 19    | 1.027      | -1.84 | 3.72 | At2g31390 | pfkB-type carbohydrate kinase family protein                                        |
| 20    | 1.054      | -1.05 | 1.88 | At3g01290 | band 7 family protein                                                               |
| 21    | 1.133      | -1.01 | 1.81 | At5g02870 | 60S ribosomal protein L4/L1 (RPL4D)                                                 |
| 22    | 1.154      | -2.31 | 3.21 | At5g17920 | 5-methyltetrahydropteroyltriglutamate                                               |
| 23    | 1.163      | -2.33 | 2.71 | At4g13940 | adenosylhomocysteinase / S-adenosyl-L-homocysteine hydrolase / AdoHcyase (SAHH)     |
| 24    | 1.208      | -1.99 | 3.83 | At4g17140 | pleckstrin homology (PH) domain-containing protein                                  |
| 25    | 1.236      | -2.33 | 2.44 | At3g54840 | Rab GTPase (ARA6)                                                                   |
| 26    | 1.249      | -2.34 | 2.45 | At3g07110 | 60S ribosomal protein L13A (RPL13aA)                                                |
| 27    | 1.274      | -0.91 | 1.69 | At5g63030 | glutaredoxin, putative                                                              |
| 28    | 1.279      | -0.17 | 3.70 | At5g27850 | 60S ribosomal protein L18 (RPL18C)                                                  |
| 29    | 1.329      | -1.40 | 1.62 | At4g17170 | Rab2-like GTP-binding protein (RAB2)                                                |
| 30    | 1.341      | -1.97 | 1.84 | At3g09630 | 60S ribosomal protein L4/L1 (RPL4A)                                                 |

Principle component analysis was performed using LOPIT data to identify proteins that co-fractionated with NAI2 (Dunkley et al., 2006). On the 2-dimensional graph of principle component 1 (PC1) and principle component 2 (PC2), the co-fractionating proteins are located near each other (Dunkley et al., 2006). \*, the top 30 of colocalizing proteins. \*\*, distance from where NAI2 is located, as calculated by  $\sqrt{(PC1+1.19)^2+(PC2-2.93)^2}$ . The data for PYK10 and At4g27860 were not available.

**Supplemental Table 4. Nucleotide Sequences of Oligonucleotide Primers Used in the Study.**

| Primer set name   | Primer name | Sequence                              | Note                                                       |
|-------------------|-------------|---------------------------------------|------------------------------------------------------------|
| NAI2 genome       | NAI2-gFW    | 5' -GGTTGAGTTTCTCAGCACTCTCTAGAAG-3'   | Amplify a <i>NAI2</i> gDNA                                 |
|                   | NAI2-gRV    | 5' -CAATCTAAGCTTGCGCCGTTCTCAGAG-3'    |                                                            |
| NAI2/-SP          | NAI2-expFW  | 5' -CAGGATGAAGGAACTGGAAG-3'           | Amplify a <i>NAI2</i> cDNA (for <i>E. coli</i> expression) |
|                   | NAI2-RV     | 5' -TCAATTAAGTGAAC TAAGAAACT-3'       |                                                            |
| NAI2/C            | NAI2-expCFW | 5' -GCCAAATACAAAACCGTCAT-3'           | Amplify a <i>NAI2</i> cDNA (for <i>E. coli</i> expression) |
|                   | NAI2-RV     | 5' -TCAATTAAGTGAAC TAAGAAACT-3'       |                                                            |
| PYK10             | PYK10-FW    | 5' -CCATGGTTTTGCAAAAGCTTCCTC-3'       | Amplify a <i>PYK10</i> cDNA                                |
|                   | PYK10-RV    | 5' -TTAAAGCTCATCCTTCTTGAGCGC-3'       |                                                            |
| <i>SaI</i> -PYK10 | PYK10-NFW   | 5' -GACGGACCTGTTTGCCCGCC-3'           | For a creation of <i>SaI</i> site in PYK10                 |
|                   | PYK10-NRV   | 5' -GACATCTGCATTTGCTGGAGAG-3'         |                                                            |
| GFP- <i>SaI</i>   | GFP-SaI/FW  | 5' -GTCGACATGGGCGGCATGGTGAGCAAGGGC-3' | Amplify a <i>GFP</i> cDNA (add <i>SaI</i> site)            |
|                   | GFP-SaI/RV  | 5' -GTCGACATCGTGGTGGTGGTGGTGGTGCCC-3' |                                                            |

## **SUPPLEMENTAL METHOD**

### **Immunoprecipitation**

Total protein was extracted from 20 plants from 8-day-old *A. thaliana* seedlings with 350  $\mu\text{L}$  of Tris-buffered saline (TBS, 50 mM Tris-HCl, pH 7.5, 150 mM NaCl) and Protease Inhibitor Cocktail (1 tablet/50 mL, Boheringer Mannheim). The homogenate was centrifuged at 9,000 x g at 4°C for 3 min to remove cell debris. 100  $\mu\text{L}$  of protein extract was mixed with 900  $\mu\text{L}$  of TBS and 1  $\mu\text{L}$  of antiserum over night at 4°C before being mixed with 20  $\mu\text{L}$  of Protein G Sepharose (GE Healthcare Life Science) for 3 h. The Protein G Sepharose beads were recovered by centrifugation and washed several times with TBS. The bound proteins were eluted with 30  $\mu\text{L}$  of 2x SDS-PAGE sample buffer (20 mM Tris-HCl, pH 6.8, 2% (w/v) SDS, 2% (v/v) 2-mercaptoethanol, 40% (v/v) glycerol).
